# Supplementary material for: Plasmodium Infection Is Associated with Impaired Hepatic Dimethylarginine Dimethylaminohydrolase Activity and Disruption of Nitric Oxide Synthase Inhibitor/Substrate Homeostasis
Source: PubMed Central journal article supplement (PMC4583463; doi:10.1371/journal.ppat.1005119), 2015-09-25
Supplement: ppat.1005119.s005.pdf [file ppat.1005119.s005.pdf]

### ADMA

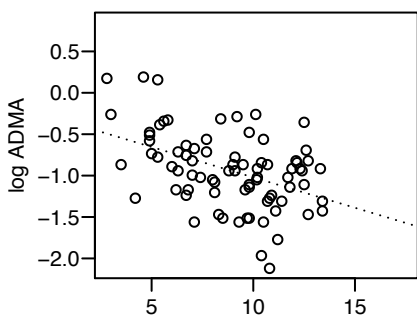

Hemoglobin  
 $r = -0.44, p = 0.00004$

### Arginine

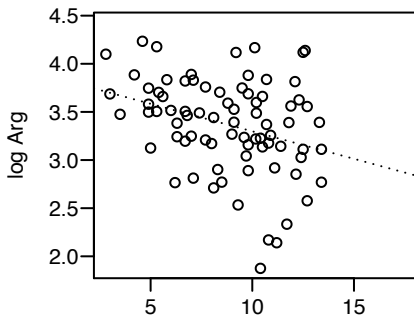

Hemoglobin  
 $r = -0.32, p = 0.004$

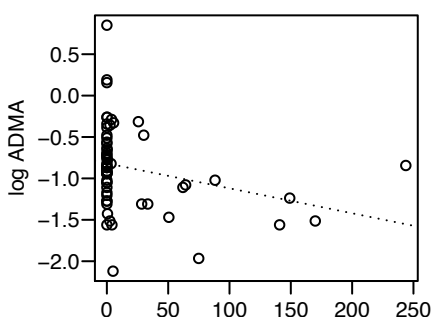

Haptoglobin  
 $r = -0.29, p = 0.02$

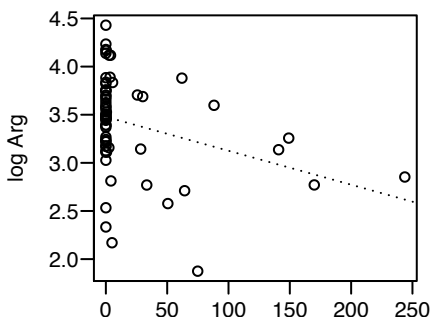

Haptoglobin  
 $r = -0.24, p = 0.06$

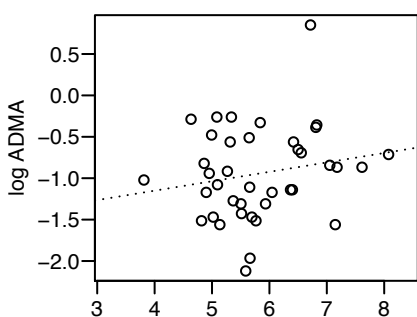

log HRP2  
 $r = +0.18, p = 0.26$

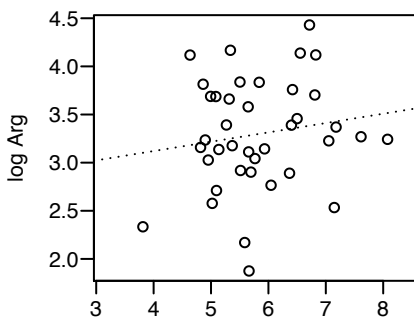

log HRP2  
 $r = +0.15, p = 0.35$

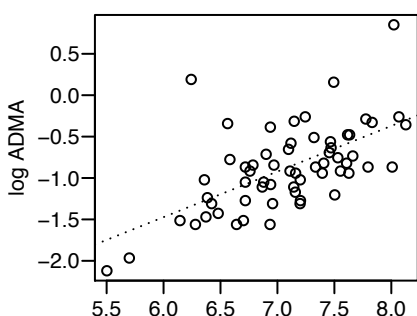

log sVCAM  
 $r = +0.60, p = 0.0000002$

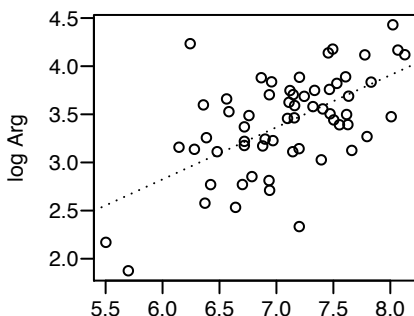

log sVCAM  
 $r = +0.59, p = 0.0000005$

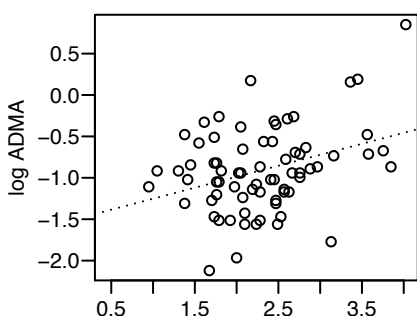

sqrt Lactate  
 $r = +0.34, p = 0.004$

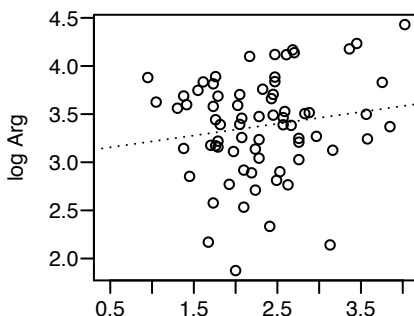

sqrt Lactate  
 $r = +0.16, p = 0.20$
