# Supplementary material for: Plasmodium Infection Is Associated with Impaired Hepatic Dimethylarginine Dimethylaminohydrolase Activity and Disruption of Nitric Oxide Synthase Inhibitor/Substrate Homeostasis
Source: PubMed Central journal article supplement (PMC4583463; doi:10.1371/journal.ppat.1005119), 2015-09-25

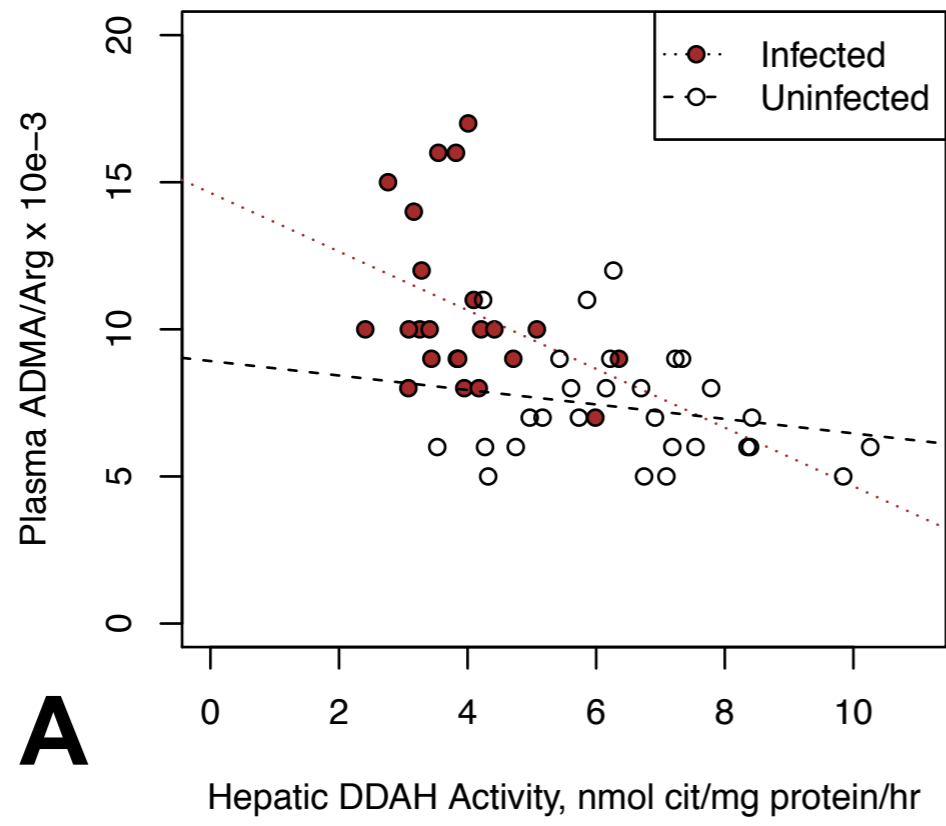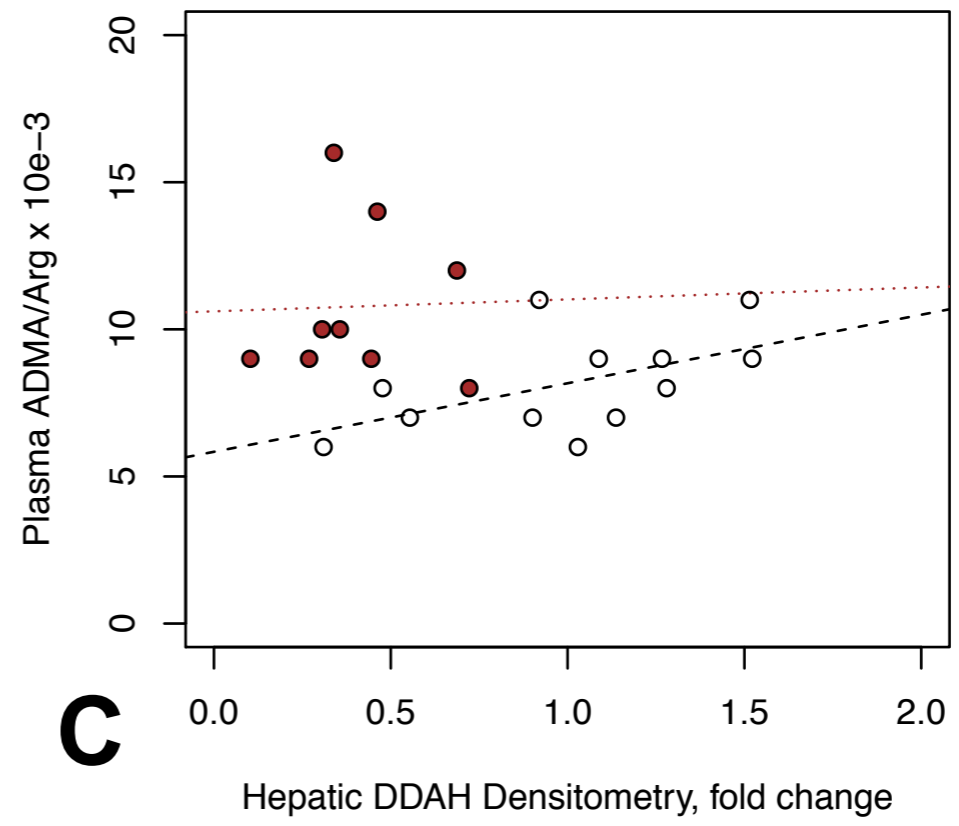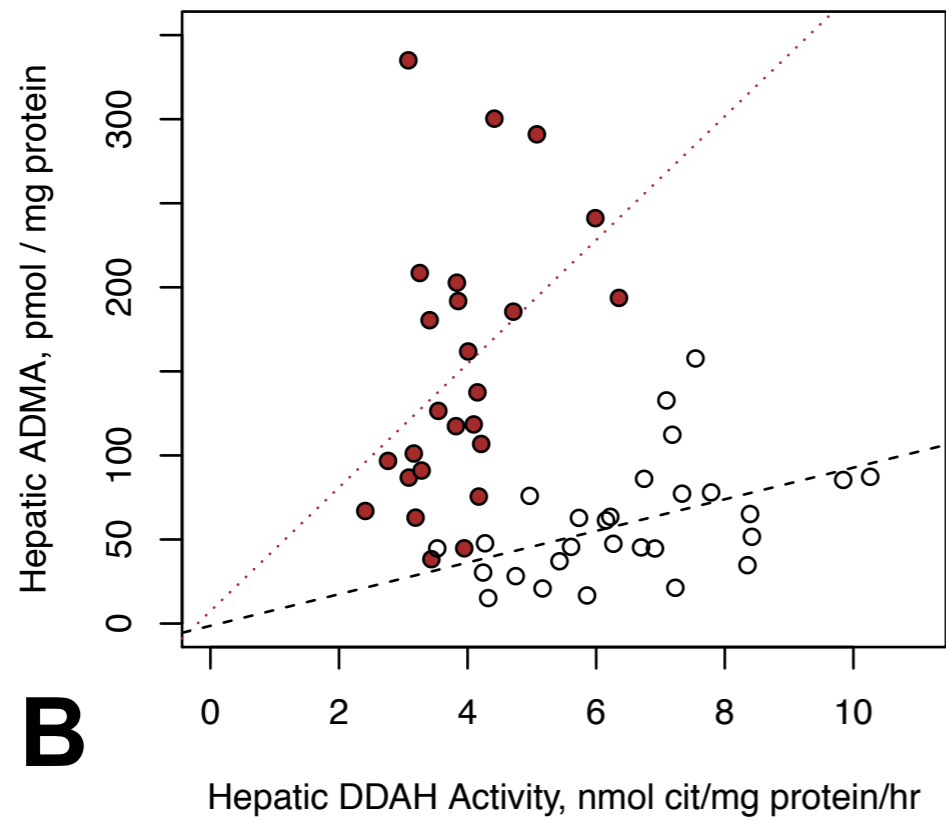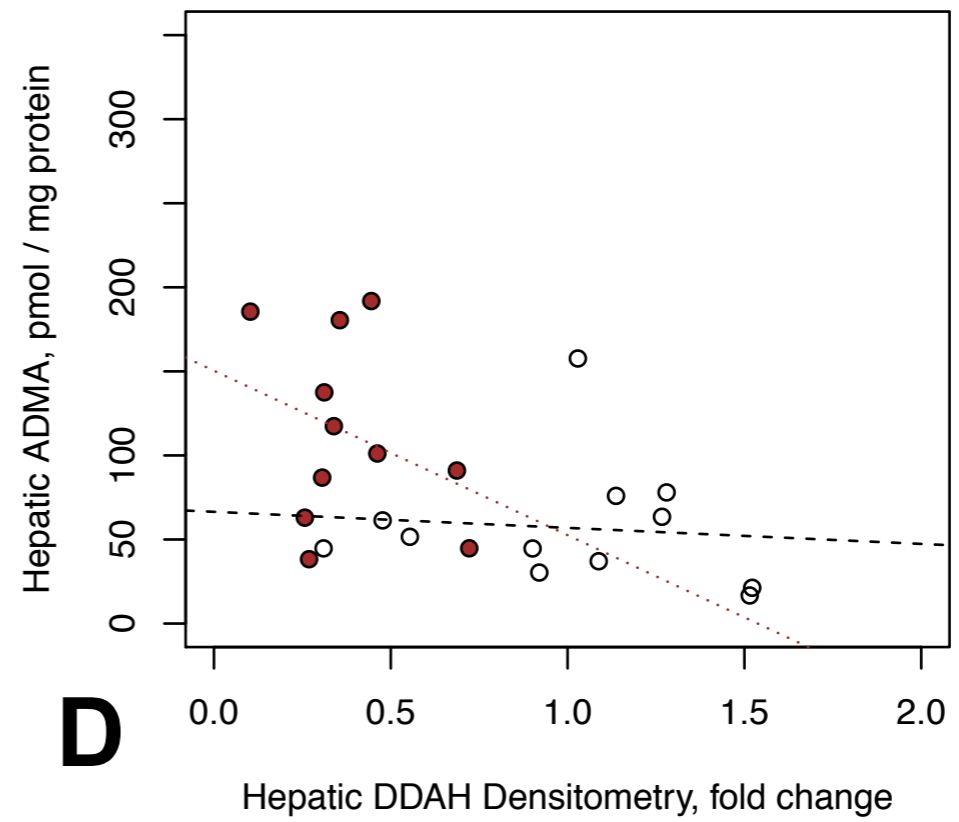

Supplement: ppat.1005119.s006.pdf [file ppat.1005119.s006.pdf]
